# Supplementary material for: Improving the Estimation of Mealtime Insulin Dose in Adults With Type 1 Diabetes: The Normal Insulin Demand for Dose Adjustment (NIDDA) study
Source: PubMed Central journal article supplement — Diabetes Care. 2011 Sep 15;34(10):2146–51. doi: 10.2337/dc11-0567 (PMC3177729; doi:10.2337/dc11-0567), 2011-09-15

SUPPLEMENTARY DATA

Supplementary Figure 1. Schematic timeline of each test day

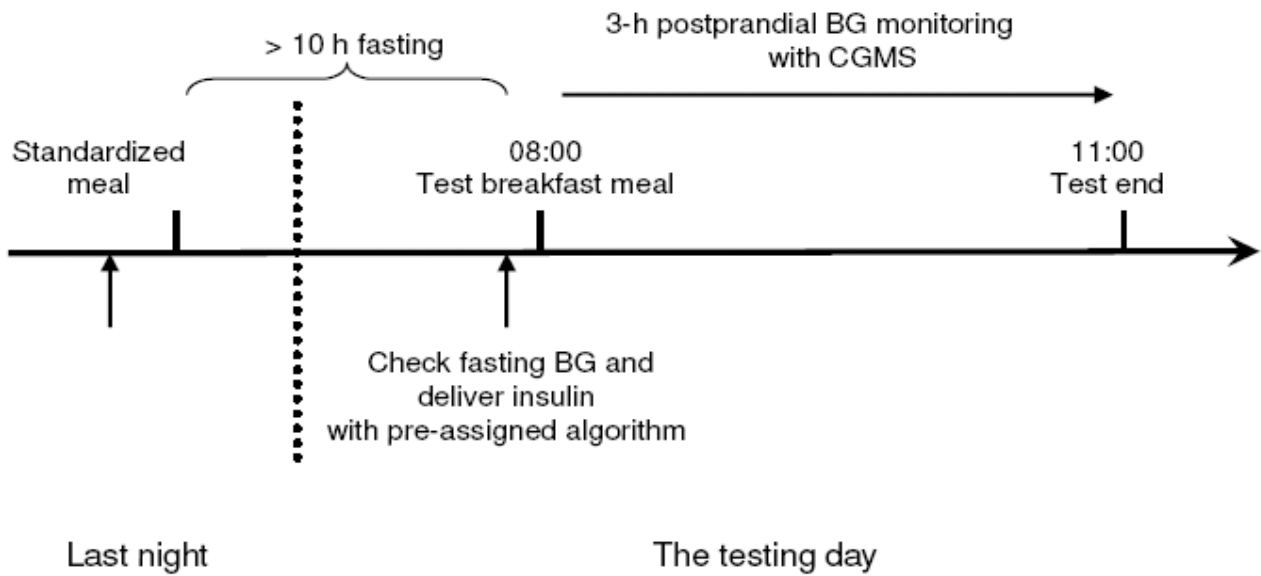

Supplementary Figure 2. Schematic insulin dose calculations based on two algorithms for an individual whose normal insulin: carbohydrate ratio is 1 unit: 10 g

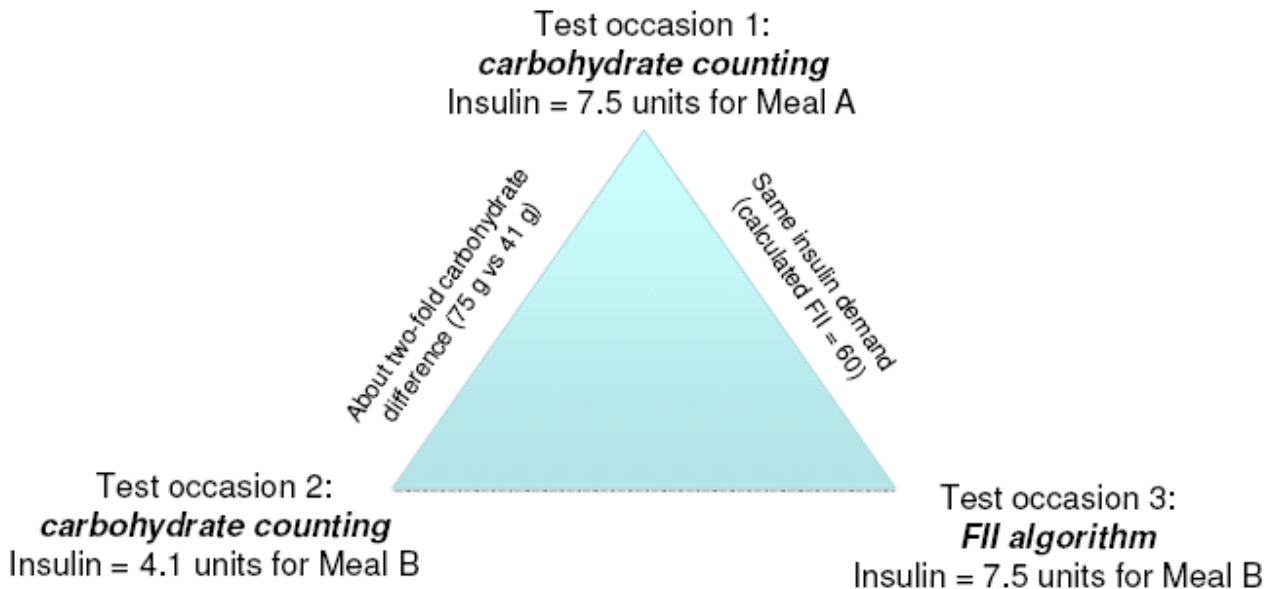

Supplement: supp_34.10.2146v110567_DC110567SupplementaryData.pdf [file supp_34.10.2146v110567_DC110567SupplementaryData.pdf]
